# Supplementary material for: Versatile and Robust Method for Antibody Conjugation to Nanoparticles with High Targeting Efficiency
Source: MDPI journal article supplement (doi:10.3390/pharmaceutics13122153), 2021-12-14
Supplement: s1 [file s1]

Supplementary Material

# Versatile and Robust Method for Antibody Conjugation to Nanoparticles with High Targeting Efficiency

Indra Van Zundert <sup>1</sup>, Maria Bravo <sup>1</sup>, Olivier Deschaume <sup>2</sup>, Pierre Cybulski <sup>1</sup>, Carmen Bartic <sup>2</sup>, Johan Hofkens <sup>1</sup>, Hiroshi Uji-i <sup>1,3</sup>, Beatrice Fortuni <sup>1,\*</sup> and Susana Rocha <sup>1,\*</sup>

<sup>1</sup> Molecular Imaging and Photonics, Chemistry Department, KU Leuven, Celestijnenlaan 200F, 3001 Heverlee, Belgium; indra.vanzundert@kuleuven.be (I.V.Z.); maria.bravo@kuleuven.be (M.B.); pierre.cybulski@kuleuven.be (P.C.); johan.hofkens@kuleuven.be (J.H.); hiroshi.ujii@kuleuven.be (H.U.-I.)

<sup>2</sup> Department of Physics and Astronomy, Soft-Matter Physics and Biophysics Section, KU Leuven, Celestijnenlaan 200D, Box 2416, 3001 Heverlee, Belgium; olivier.deschaume@kuleuven.be (O.D.); carmen.bartic@kuleuven.be (C.B.)

<sup>3</sup> Research Institute for Electronic Science (RIES), Hokkaido University, N20W10, Kita Ward, Sapporo 001-0020, Hokkaido, Japan

\* Correspondence: beatrice.fortuni@kuleuven.be (B.F.); susana.rocha@kuleuven.be (S.R.)

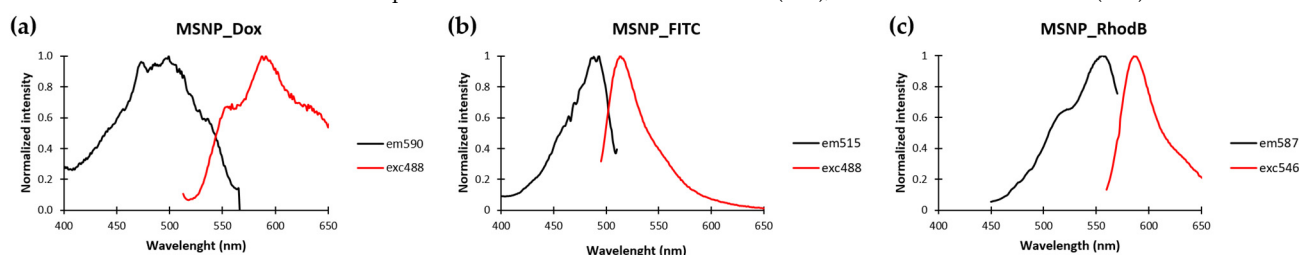

**Figure S1:** Emission and excitation spectra of drug and dye-loaded MSNPs. (a) dox-loaded MSNPs. (b) Fluorescein (FITC) encapsulated MSNPs and (c) RhodamineB (RhoB) loaded MSNPs

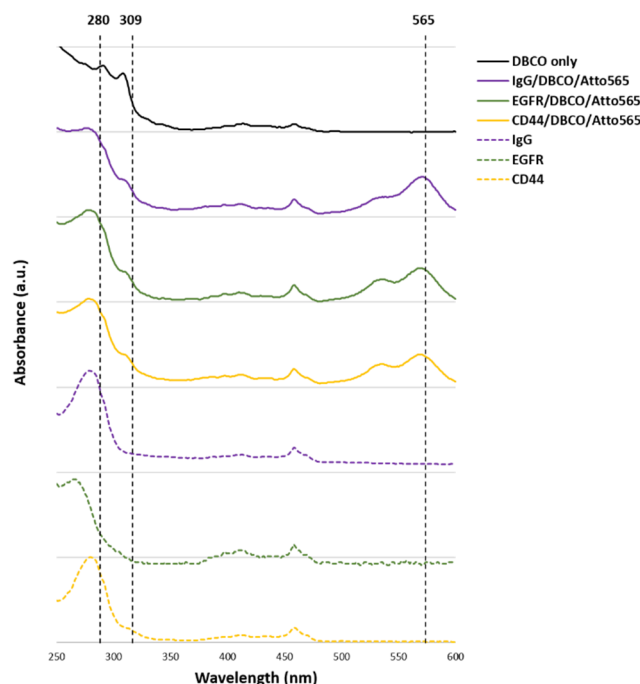

**Figure S2:** Absorbance for dual-labelled antibodies (IgG/DBCO/Atto565, EGFR/DBCO/Atto565 and CD44/DBCO/Atto565), non-labelled antibodies (IgG, EGFR and CD44) and DBCO only. Antibody absorption could be observed at 280 nm, a shoulder from the DBCO absorption at 309 nm and the attached dye (Atto565) at 565 nm.

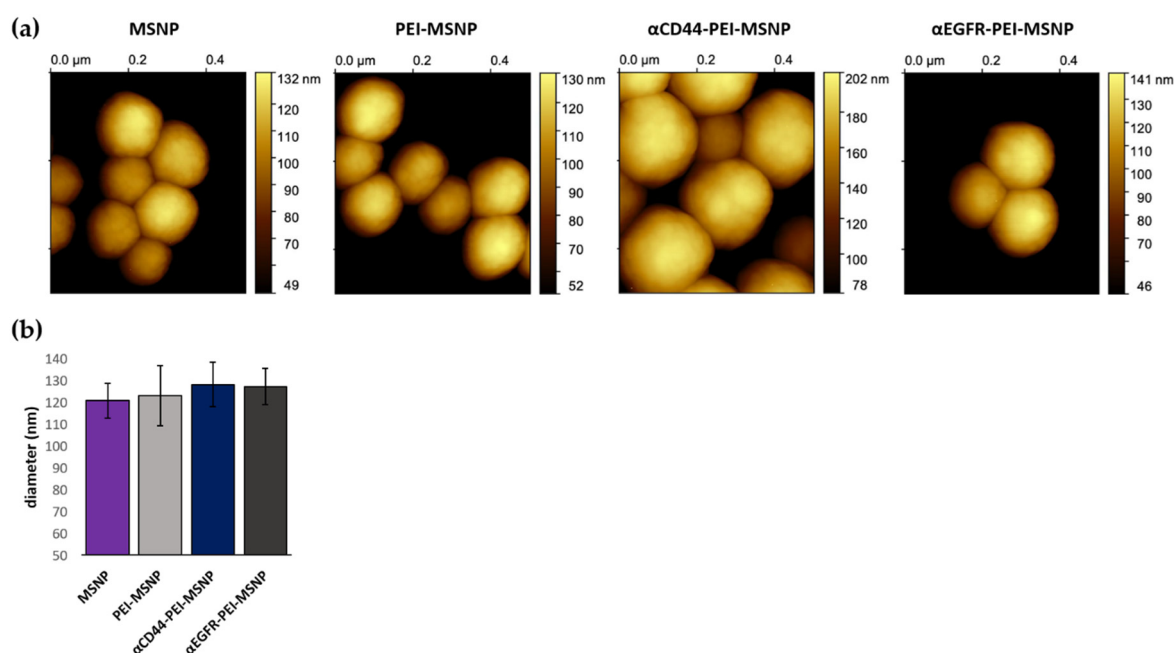

**Figure S3.** (a) AFM images of MSNPs, PEI-MSNPs, αCD44-PEI-MSNPs and αEGFR-PEI-MSNPs, (b) Graph of the average height measured with AFM (diameter). Error bars indicate ± SD.

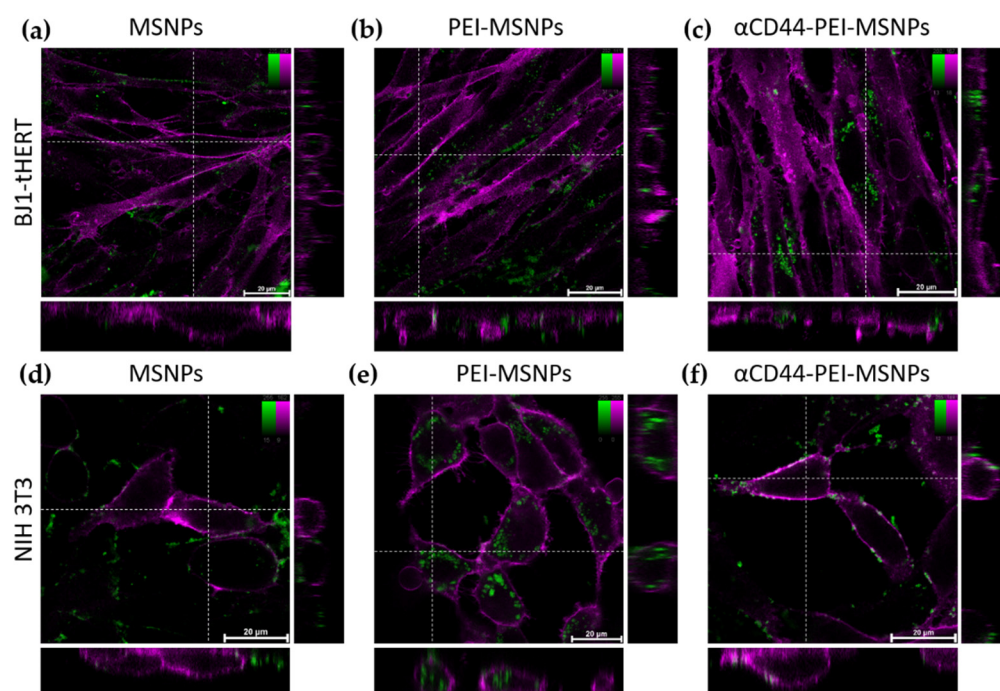

**Figure S4.** Confocal fluorescence microscopy images showing the influence of different MSNP coating in the uptake of nanoparticles in BJ1-tHERT and NIH 3T3 cells. Internalization of bare MSNP (a,d), PEI-coated MSNPs (PEI-MSNPs, panels b,e) and CD44 functionalized MSNPs (αCD44-PEI-MSNPs, panels c,f) in BJ1-tHERT cells (a–c) and NIH 3T3 cells (d–f). Nanoparticles were loaded with RhoB (green) and the plasma membrane was stained with DiR (magenta). The central square represents a single xy plane, while the bottom and left panels are the xz and yz cross-sections, indicated by the dashed lines. Scale bar is 20 μm, color bars display the intensity values.

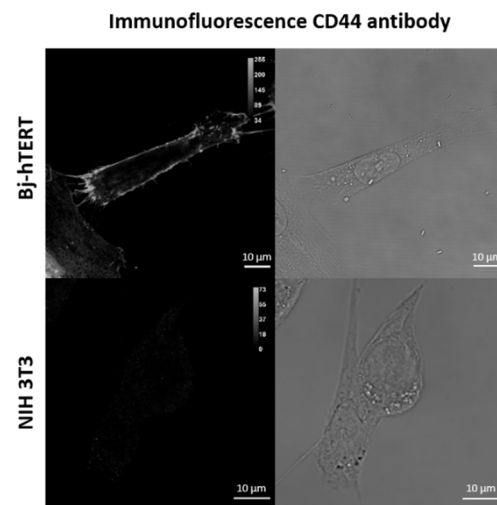

**Figure S5.** immunofluorescence (secondary goat-anti-rat IgG-AF488) staining showing the expression of absence of the CD44 receptor in Bj-hTERT and NIH 3T3, respectively. Scale bar is 10 μm.

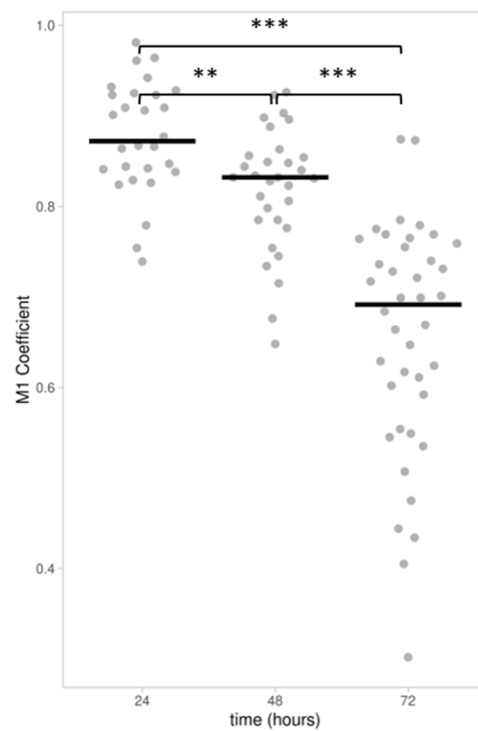

**Figure S6.** Manders' Coefficient (MC) representing the fraction of overlap between the  $\alpha$ CD44-PEI-MSNPs channel with the LysoTacker Deep Red channel. n values for 24, 48 and 72 h are 28, 31 and 40, respectively. \*\* ( $p < 0,01$ ) and \*\*\* ( $p < 0,001$ ) .

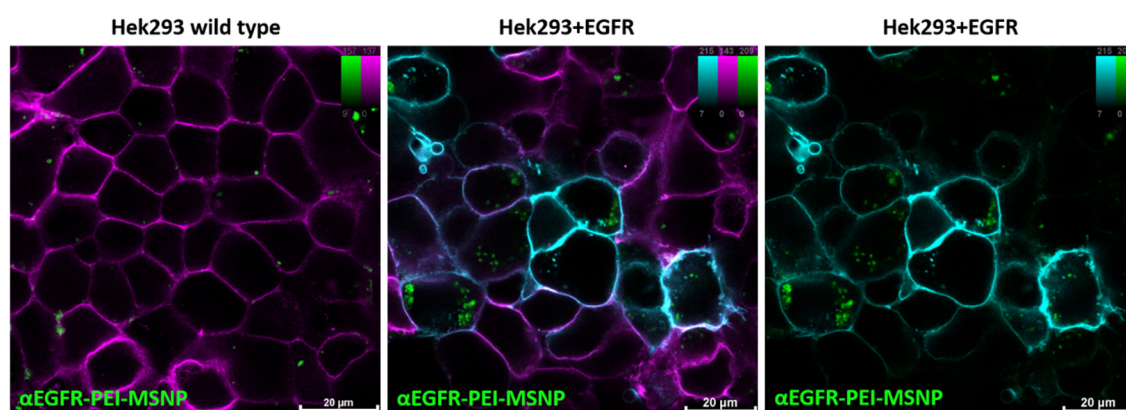

**Figure S7.** Internalization of  $\alpha$ EGFR-PEI-MSNPs in wild type Hek293 (left panel) and Hek293 cells transiently transfected with a pcDBA3-EGFR-HaloTag® (middle and right panel). The right panel shows the nanoparticle and EGFR receptor channel overlay. The EGFR receptors in the transfected cells (Hek293+EGFR), after staining with a 488 HaloTag® ligand, are shown in cyan.  $\alpha$ EGFR-PEI-MSNPs, encapsulated with FITC, are depicted in green. The cells membrane, stained with DiR, is colored magenta.

**Table S1.**  $\alpha$ CD44-PEI-MSNPs aggregation in different solutions: average OD600 values for  $\alpha$ CD44-PEI-MSNPs dissolved in MilliQ water, FBS and DMEM with 10% FBS before and after 24 hours of incubation at 37 °C. Mean  $\pm$  SD (3 measurements in 3 different days).

|              | 0 h              | 24 h             |
|--------------|------------------|------------------|
| MilliQ water | 0.09 $\pm$ 0.006 | 0.10 $\pm$ 0.006 |
| FBS          | 0.10 $\pm$ 0.005 | 0.10 $\pm$ 0.006 |
| DMEM+10%FBS  | 0.13 $\pm$ 0.01  | 0.12 $\pm$ 0.017 |
